# Supplementary material for: Divergence of premating behaviors in the closely related species Drosophila subquinaria and D. recens
Source: PubMed Central journal article supplement (PMC3586646; doi:10.1002/ece3.477), 2013-01-09
Supplement: ece30003-0365-SD1.pdf [file ece30003-0365-SD1.pdf]

**Supplemental Table 1.** Mating frequency and results of a logistic regression for each manipulation.

| Population        | Time   | Manipulation | Sex Manipulated | Total Pairs | Total Mated | Model/Effect | Likelihood ratio $\chi^2$ | d.f. | P-value         |
|-------------------|--------|--------------|-----------------|-------------|-------------|--------------|---------------------------|------|-----------------|
| Allopatric recens | 24 hrs | Eyes         | Female Only     | 30          | 28          | Whole model  | 24.82                     | 2    | < <b>0.0001</b> |
| Allopatric recens | 24 hrs | Eyes         | Male Only       | 30          | 14          | Female       | 0.41                      | 1    | 0.520           |
| Allopatric recens | 24 hrs | Eyes         | Both            | 30          | 13          | Male         | 24.49                     | 1    | < <b>0.0001</b> |
| Allopatric recens | 24 hrs | Eyes         | Neither         | 30          | 24          |              |                           |      |                 |
| Allopatric recens | 24 hrs | Aristae      | Female Only     | 30          | 26          | Whole model  | 0                         | 2    | 1               |
| Allopatric recens | 24 hrs | Aristae      | Male Only       | 30          | 26          | Female       | 0                         | 1    | 1               |
| Allopatric recens | 24 hrs | Aristae      | Both            | 30          | 28          | Male         | 0                         | 1    | 1               |
| Allopatric recens | 24 hrs | Aristae      | Neither         | 30          | 28          |              |                           |      |                 |
| Allopatric recens | 24 hrs | Antennae     | Female Only     | 30          | 26          | Whole model  | 3.47                      | 2    | 0.176           |
| Allopatric recens | 24 hrs | Antennae     | Male Only       | 30          | 29          | Female       | 3.47                      | 1    | 0.062           |
| Allopatric recens | 24 hrs | Antennae     | Both            | 30          | 26          | Male         | 0                         | 1    | 1.00            |
| Allopatric recens | 24 hrs | Antennae     | Neither         | 30          | 28          |              |                           |      |                 |
| Allopatric recens | 24 hrs | Wings        | Female Only     | 30          | 27          | Whole model  | 3.19                      | 2    | 0.203           |
| Allopatric recens | 24 hrs | Wings        | Male Only       | 30          | 24          | Female       | 0.064                     | 1    | 0.800           |
| Allopatric recens | 24 hrs | Wings        | Both            | 30          | 23          | Male         | 3.128                     | 1    | 0.077           |
| Allopatric recens | 24 hrs | Wings        | Neither         | 30          | 27          |              |                           |      |                 |
| Allopatric recens | 3 hrs  | Eyes         | Female Only     | 30          | 21          | Whole model  | 60.406                    | 2    | < <b>0.0001</b> |
| Allopatric recens | 3 hrs  | Eyes         | Male Only       | 30          | 8           | Female       | 8.389                     | 1    | <b>0.0038</b>   |
| Allopatric recens | 3 hrs  | Eyes         | Both            | 30          | 3           | Male         | 55.574                    | 1    | < <b>0.0001</b> |
| Allopatric recens | 3 hrs  | Eyes         | Neither         | 30          | 28          |              |                           |      |                 |
| Allopatric recens | 3 hrs  | Aristae      | Female Only     | 30          | 24          | Whole model  | 0.137                     | 2    | 0.934           |
| Allopatric recens | 3 hrs  | Aristae      | Male Only       | 30          | 25          | Female       | 0.069                     | 1    | 0.793           |
| Allopatric recens | 3 hrs  | Aristae      | Both            | 30          | 27          | Male         | 0.069                     | 1    | 0.793           |
| Allopatric recens | 3 hrs  | Aristae      | Neither         | 30          | 27          |              |                           |      |                 |
| Allopatric recens | 3 hrs  | Antennae     | Female Only     | 30          | 20          | Whole model  | 5.340                     | 2    | 0.069           |
| Allopatric recens | 3 hrs  | Antennae     | Male Only       | 30          | 25          | Female       | 5.340                     | 1    | <b>0.021</b>    |
| Allopatric recens | 3 hrs  | Antennae     | Both            | 30          | 23          | Male         | 0                         | 1    | 1.000           |
| Allopatric recens | 3 hrs  | Antennae     | Neither         | 30          | 28          |              |                           |      |                 |

|                        |        |          |             |    |    |             |        |   |                    |
|------------------------|--------|----------|-------------|----|----|-------------|--------|---|--------------------|
| Allopatric recens      | 3 hrs  | Wings    | Female Only | 30 | 27 | Whole model | 10.374 | 2 | <b>0.006</b>       |
| Allopatric recens      | 3 hrs  | Wings    | Male Only   | 30 | 26 | Female      | 4.140  | 1 | <b>0.042</b>       |
| Allopatric recens      | 3 hrs  | Wings    | Both        | 30 | 19 | Male        | 6.442  | 1 | <b>0.011</b>       |
| Allopatric recens      | 3 hrs  | Wings    | Neither     | 30 | 28 |             |        |   |                    |
| Allopatric subquinaria | 24 hrs | Eyes     | Female Only | 30 | 25 | Whole model | 36.845 | 2 | <b>&lt; 0.0001</b> |
| Allopatric subquinaria | 24 hrs | Eyes     | Male Only   | 30 | 9  | Female      | 0      | 1 | 1.000              |
| Allopatric subquinaria | 24 hrs | Eyes     | Both        | 30 | 9  | Male        | 36.845 | 1 | <b>&lt; 0.0001</b> |
| Allopatric subquinaria | 24 hrs | Eyes     | Neither     | 30 | 25 |             |        |   |                    |
| Allopatric subquinaria | 24 hrs | Aristae  | Female Only | 30 | 22 | Whole model | 0.159  | 2 | 0.924              |
| Allopatric subquinaria | 24 hrs | Aristae  | Male Only   | 30 | 23 | Female      | 0      | 1 | 1.000              |
| Allopatric subquinaria | 24 hrs | Aristae  | Both        | 30 | 20 | Male        | 0.159  | 1 | 0.690              |
| Allopatric subquinaria | 24 hrs | Aristae  | Neither     | 30 | 19 |             |        |   |                    |
| Allopatric subquinaria | 24 hrs | Antennae | Female Only | 30 | 1  | Whole model | 85.421 | 2 | <b>&lt; 0.0001</b> |
| Allopatric subquinaria | 24 hrs | Antennae | Male Only   | 30 | 24 | Female      | 85.421 | 1 | <b>&lt; 0.0001</b> |
| Allopatric subquinaria | 24 hrs | Antennae | Both        | 30 | 1  | Male        | 0      | 1 | 1.000              |
| Allopatric subquinaria | 24 hrs | Antennae | Neither     | 30 | 24 |             |        |   |                    |
| Allopatric subquinaria | 24 hrs | Wings    | Female Only | 30 | 19 | Whole model | 24.851 | 2 | <b>&lt; 0.0001</b> |
| Allopatric subquinaria | 24 hrs | Wings    | Male Only   | 30 | 11 | Female      | 3.305  | 1 | .069               |
| Allopatric subquinaria | 24 hrs | Wings    | Both        | 30 | 8  | Male        | 22.134 | 1 | <b>&lt; 0.0001</b> |
| Allopatric subquinaria | 24 hrs | Wings    | Neither     | 30 | 25 |             |        |   |                    |
| Allopatric subquinaria | 3 hrs  | Wings    | Female Only | 30 | 15 | Whole model | 22.696 | 2 | <b>&lt; 0.0001</b> |
| Allopatric subquinaria | 3 hrs  | Wings    | Male Only   | 30 | 7  | Female      | 2.183  | 1 | 0.140              |
| Allopatric subquinaria | 3 hrs  | Wings    | Both        | 30 | 2  | Male        | 20.837 | 1 | <b>&lt; 0.0001</b> |
| Allopatric subquinaria | 3 hrs  | Wings    | Neither     | 30 | 17 |             |        |   |                    |
| Sympatric subquinaria  | 24 hrs | Eyes     | Female Only | 30 | 22 | Whole model | 29.423 | 2 | <b>&lt; 0.0001</b> |
| Sympatric subquinaria  | 24 hrs | Eyes     | Male Only   | 30 | 13 | Female      | 3.519  | 1 | 0.061              |
| Sympatric subquinaria  | 24 hrs | Eyes     | Both        | 30 | 8  | Male        | 26.649 | 1 | <b>&lt; 0.0001</b> |
| Sympatric subquinaria  | 24 hrs | Eyes     | Neither     | 30 | 26 |             |        |   |                    |
| Sympatric subquinaria  | 24 hrs | Aristae  | Female Only | 30 | 20 | Whole model | 0.456  | 2 | 0.796              |
| Sympatric subquinaria  | 24 hrs | Aristae  | Male Only   | 30 | 22 | Female      | 0.410  | 1 | 0.522              |
| Sympatric subquinaria  | 24 hrs | Aristae  | Both        | 30 | 24 | Male        | 0.046  | 1 | 0.831              |
| Sympatric subquinaria  | 24 hrs | Aristae  | Neither     | 30 | 25 |             |        |   |                    |

*Giglio and Dyer, 2013*

|                       |        |          |             |    |    |             |        |   |                 |
|-----------------------|--------|----------|-------------|----|----|-------------|--------|---|-----------------|
| Sympatric subquinaria | 24 hrs | Antennae | Female Only | 30 | 0  | Whole model | 98.890 | 2 | < <b>0.0001</b> |
| Sympatric subquinaria | 24 hrs | Antennae | Male Only   | 30 | 18 | Female      | 95.995 | 1 | < <b>0.0001</b> |
| Sympatric subquinaria | 24 hrs | Antennae | Both        | 30 | 0  | Male        | 7.595  | 1 | <b>0.0059</b>   |
| Sympatric subquinaria | 24 hrs | Antennae | Neither     | 30 | 27 |             |        |   |                 |
| Sympatric subquinaria | 24 hrs | Wings    | Female Only | 30 | 25 | Whole model | 46.259 | 2 | < <b>0.0001</b> |
| Sympatric subquinaria | 24 hrs | Wings    | Male Only   | 30 | 7  | Female      | 0      | 1 | 1.000           |
| Sympatric subquinaria | 24 hrs | Wings    | Both        | 30 | 5  | Male        | 46.259 | 1 | < <b>0.0001</b> |
| Sympatric subquinaria | 24 hrs | Wings    | Neither     | 30 | 23 |             |        |   |                 |
